# Supplementary material
Source: HighWire-hosted journal article supplement (http://www.qdcxjkg.com/highwire/filestream/113563/field_highwire_adjunct_files/0/Hoogendoorn_2012_CEAPOET_SupplmaterialERJ.pdf)
Supplement: Hoogendoorn_2012_CEAPOET_SupplmaterialERJ.pdf [file Hoogendoorn_2012_CEAPOET_SupplmaterialERJ.pdf]

## **SUPPLEMENTARY MATERIAL**

### **Manuscript**

Cost-effectiveness of tiotropium versus salmeterol: the POET-COPD trial

Table A1: German unit costs POET-COPD trial (2010, €)

| Type of care                                  | Unit                     |                                           | SHI perspective                                  | Societal perspective*                                                            |
|-----------------------------------------------|--------------------------|-------------------------------------------|--------------------------------------------------|----------------------------------------------------------------------------------|
| Study medication [1]                          | Tiotropium<br>HandiHaler | Day 1-30                                  | 1.73/day                                         | 2.31/day                                                                         |
|                                               |                          | Day 31-365                                | 1.58/day                                         | 1.99/day                                                                         |
|                                               | Salmeterol               | Day 1-365                                 | 1.01/day                                         | 1.15/day                                                                         |
|                                               |                          | Day 1-30                                  | 1.75/day                                         | 2.29/day                                                                         |
|                                               |                          | Day 31-365                                | 1.62/day                                         | 2.03/day                                                                         |
|                                               |                          | Not ICU                                   | 1 day                                            | 1041.93                                                                          |
|                                               | 2 days                   | 1802.02                                   |                                                  |                                                                                  |
|                                               | 3-17 days                | 2562.11                                   |                                                  |                                                                                  |
|                                               | 18 days or longer        | 2562.11 + (number of days -17)<br>*191.56 |                                                  |                                                                                  |
| Hospitalization [2,3]                         | ICU                      | 3-17 days                                 | 3017.62                                          | SHI perspective + €10 per day<br>with a maximum of €280 per<br>year <sup>1</sup> |
|                                               |                          | 18 days or longer                         | 3017.62 + (number of days -17)<br>*191.56        |                                                                                  |
| Emergency Room without<br>hospitalization [4] |                          | Visit                                     | 15,58 per quarter<br>Each additional visit 10.83 | 15,58 per quarter<br>Each additional visit 10.83                                 |
| Ambulance [5]                                 |                          | Ride                                      | 397.36                                           | 404.85                                                                           |
| General Practitioner [4]                      | Visit to practice        | <60 yr                                    | 31.50 per quarter                                | 41.50 per quarter                                                                |
|                                               |                          | >=60 yr                                   | 35.70 per quarter                                | 45.70 per quarter                                                                |
|                                               | Home visit               |                                           | 21.75 per visit                                  | 21.75 per visit                                                                  |
| Specialists [4]                               |                          |                                           |                                                  |                                                                                  |
| Lung physician                                | Visit                    | <60 yr                                    | 19.95 per quarter                                | 29.95 per quarter                                                                |
|                                               |                          | >=60 yr                                   | 20.83 per quarter                                | 30.83 per quarter                                                                |
|                                               | Home visit               |                                           | 21.75 per visit                                  | 21.75 per visit                                                                  |
| Cardiologist                                  | Visit                    | <60 yr                                    | 20.48 per quarter                                | 30.48 per quarter                                                                |
|                                               |                          | >=60 yr                                   | 21.18 per quarter                                | 31.18 per quarter                                                                |
|                                               | Home visit               |                                           | 21.75 per visit                                  | 21.75 per visit                                                                  |
| Internist                                     | Visit                    | <60 yr                                    | 19.95 per quarter                                | 29.95 per quarter                                                                |

|                                                              |                                         |                          |                        |                             |
|--------------------------------------------------------------|-----------------------------------------|--------------------------|------------------------|-----------------------------|
|                                                              |                                         | >=60 yr                  | 21.35 per quarter      | 31.35 per quarter           |
|                                                              | Home visit                              |                          | 21.75 per visit        | 21.75 per visit             |
| <b>Table 1 continued</b>                                     |                                         |                          |                        |                             |
| <b>Type of care</b>                                          |                                         |                          | <b>SHI perspective</b> | <b>Societal perspective</b> |
| Other healthcare provider<br>(assumed to be physiotherapist) | Visit                                   |                          | €10.40 per visit       | €12.80 per visit            |
| Concomittant medication <sup>#</sup> [6]                     | Inhaled corticosteroids (R03BA)         |                          | €0.59/day              | €0.69/day                   |
|                                                              | Short-acting anticholinergic (R03BB)    |                          | €1.07/day              | €1.48/day                   |
|                                                              | Short-acting $\beta$ -agonist (R03AC)   |                          | €0.43/day              | €0.50/day                   |
|                                                              | Methylxanthine (R03DA)                  |                          | €0.23/day              | €0.27/day                   |
|                                                              | Mucolytics (R05CB)                      |                          | €0.40/day              | €0.47/day                   |
|                                                              | Antibiotics (J01)                       |                          | €1.63/day              | €1.98/day                   |
|                                                              | Systemic corticosteroids (oral) (H02AB) |                          | €0.30/day              | €0.35/day                   |
|                                                              |                                         |                          |                        |                             |
| Travel costs [7]                                             |                                         | Costs per kilometer (km) | -                      | €0.20                       |
| Productivity costs [8]                                       | Males                                   | Full-time                | -                      | €21.99                      |
|                                                              |                                         | Part-time                | -                      | €6.78                       |
|                                                              | Females                                 | Full-time                | -                      | €7.73                       |
|                                                              |                                         | Part-time                | -                      | €6.19                       |

\* Costs from the societal perspective were calculated as the costs from the SHI perspective plus potential patients' co-payments, except for medication. The societal costs of medications were based on the list price in 2010, while medication costs from the SHI perspective were calculated as the list price minus mandatory discounts to the SHI and pharmacies and the patients' co-payments. Costs paid by the patients or their families consisted of costs of patients' co-payments for hospitalizations, ambulance transportation, visits to health care providers, medication, and costs of travelling

# Unit costs are weighted average unit costs within the specific ATC subgroup using the number of DDDs as a weight

## References

1. Lauer-Taxe. 2010; Accessed Sept, 2010.

2. AOK-Bundesverband. Übersicht über die für 2010 gültigen Landesbasisfallwerte in den einzelnen Bundesländern. Berlin. 2010; Available at: [http://www.aok-gesundheitspartner.de/imperia/md/gpp/bund/krankenhaus/budgetverhandlung/landesbasisfallwert/uebersicht\\_lbfw\\_2010.pdf](http://www.aok-gesundheitspartner.de/imperia/md/gpp/bund/krankenhaus/budgetverhandlung/landesbasisfallwert/uebersicht_lbfw_2010.pdf). Accessed June, 2010.
3. Institut für das Entgeltsystem im Krankenhaus. Fallpauschalen - Katalog 2010. Siegburg. 2009; Available at: [http://www.g-drg.de/cms/index.php/G-DRG-System\\_2010/Fallpauschalen-Katalog/Fallpauschalen-Katalog\\_2010](http://www.g-drg.de/cms/index.php/G-DRG-System_2010/Fallpauschalen-Katalog/Fallpauschalen-Katalog_2010). Accessed June, 2010.
4. Kassenärztliche Bundesvereinigung. Einheitlicher Bewertungsmaßstab (EBM) (Stand: 2. Quartal 2010). Berlin. 2010; Available at: <http://daris.kbv.de/daris.asp>. Accessed June, 2010.
5. Verband der Ersatzkassen e. V. Rettungsdienstgebühren im Land Brandenburg. Berlin. 2009; Available at: <http://www.vdek.com/LVen/BRA/Vertragspartner/Rettungsdienst/Gebuehren/index.htm>. Accessed June, 2010.
6. Schwabe U, Paffrath D. Arzneiverordnungs-Report 2009: Aktuelle Daten, Kosten, Trends und Kommentare. Heidelberg: Springer Berlin 2009.
7. Auto Club Europa e. V. Verkehrspreise überdurchschnittlich gestiegen (Pressmitteilung). Stuttgart. 2007; Available at: <http://www.ace-online.de/der-club/news/verkehrspreise-ueberdurchschnittlich-gestiegen/browse/29.html?cHash=3fa51cb89e>. Accessed June, 2010.
8. Statistisches Bundesamt. Verdienste und Arbeitskosten. Arbeitsnehmersverdienste. Fachserie 16, Reihe 2.3. Wiesbaden. 2010; Available at: <https://www-ec.destatis.de/csp/shop/sfg/bpm.html.cms.cBroker.cls?cmspath=struktur,vollanzeige.csp&ID=1025480>. Accessed June 2010.

Table A2: Annual costs of maintenance treatment from the SHI perspective, in €2010

| Costs of maintenance therapy (per year)       | Moderate COPD |      |           |               |             | Severe COPD  |      |           |               |              | Very severe COPD |       |           |               |              |
|-----------------------------------------------|---------------|------|-----------|---------------|-------------|--------------|------|-----------|---------------|--------------|------------------|-------|-----------|---------------|--------------|
|                                               | Resource use  |      | Unit cost | Total cost    |             | Resource use |      | Unit cost | Total costs   |              | Resource use     |       | Unit cost | Total costs   |              |
|                                               | mean          | SE   |           | mean          | SE          | mean         | SE   |           | mean          | SE           | mean             | SE    |           | mean          | SE           |
| Outpatient visits to general practitioner*    | 4.84          | 0.42 | 19.54     | 94.57         | 8.18        | 4.10         | 0.30 | 19.54     | 80.11         | 5.95         | 0.00             | 0.00  | 19.54     | 0.00          | 0.00         |
| Outpatient visits to respiratory specialists* | 1.03          | 0.12 | 21.16     | 21.80         | 2.55        | 3.35         | 0.31 | 21.16     | 70.97         | 6.53         | 7.12             | 0.67  | 21.16     | 150.68        | 14.26        |
| Spirometries*                                 | 3.00          | 0.27 | 5.95      | 17.85         | 1.63        | 5.00         | 0.26 | 5.95      | 29.75         | 1.56         | 6.00             | 0.36  | 5.95      | 35.70         | 2.11         |
| Influenza vaccination (%)*                    | 0.60          | 0.03 | 18.15     | 10.89         | 0.59        | 0.71         | 0.03 | 18.15     | 12.89         | 0.54         | 0.75             | 0.03  | 18.15     | 13.61         | 0.53         |
| Pneumococcal vaccination (%)*                 | 0.38          | 0.04 | 27.82     | 10.57         | 0.98        | 0.48         | 0.04 | 27.82     | 13.35         | 1.08         | 0.52             | 0.04  | 27.82     | 14.47         | 1.12         |
| Days antibiotics used**                       | 2.31          | 0.62 | 1.63      | 3.77          | 1.01        | 4.75         | 1.53 | 1.63      | 7.74          | 2.49         | 0.92             | 0.47  | 1.63      | 1.50          | 0.77         |
| Days systemic steroids used**                 | 26.46         | 4.08 | 0.30      | 7.94          | 1.22        | 38.54        | 4.98 | 0.30      | 11.56         | 1.49         | 17.44            | 7.75  | 0.30      | 5.23          | 2.33         |
| Days short-acting beta-agonists used**        | 9.27          | 2.44 | 0.43      | 3.99          | 1.05        | 5.67         | 1.85 | 0.43      | 2.44          | 0.80         | 7.35             | 7.77  | 0.43      | 3.16          | 3.34         |
| Days short-acting anticholinergics used**     | 0.81          | 0.48 | 1.07      | 0.87          | 0.51        | 0.90         | 0.78 | 1.48      | 1.33          | 1.15         | 13.76            | 8.31  | 1.48      | 20.36         | 12.30        |
| Days inhaled corticosteroids used**           | 84.46         | 6.27 | 0.59      | 49.83         | 3.70        | 89.51        | 7.21 | 0.59      | 52.81         | 4.25         | 88.57            | 20.10 | 0.59      | 52.26         | 11.86        |
| Days theophylline used**                      | 55.86         | 5.33 | 0.23      | 12.85         | 1.23        | 81.29        | 7.15 | 0.23      | 18.70         | 1.64         | 58.70            | 16.10 | 0.23      | 13.50         | 3.70         |
| Days mucolytics used**                        | 6.62          | 1.82 | 0.40      | 2.65          | 0.73        | 9.75         | 2.54 | 0.40      | 3.90          | 1.02         | 7.32             | 4.04  | 0.40      | 2.93          | 1.62         |
| Days oxygen used**                            | 0.86          | 0.26 | 4.63      | 3.98          | 1.20        | 3.71         | 0.63 | 4.63      | 17.18         | 2.92         | 5.81             | 1.72  | 4.63      | 26.90         | 7.96         |
| Travel (km)**                                 | -             | -    | 0.20      | 0.00          | 0.00        | 0.00         | 0.00 | 0.20      | 0.00          | 0.00         | 0.00             | 0.00  | 0.20      | 0.00          | 0.00         |
| <b>Total costs</b>                            |               |      |           | <b>241.55</b> | <b>9.92</b> |              |      |           | <b>322.73</b> | <b>11.08</b> |                  |       |           | <b>340.30</b> | <b>24.46</b> |

\* Source resource use: German expert panel: Bowles D, Von der Schulenburg JM. Ökonomische Bewertung ambulanter Arztkontakte von COPD-Patienten in Deutschland – Ergebnisse einer Befragung von Allgemeinmedizinern und Pneumologen (In German). *Pneumologie*. 2011. **65**(6): 379-87.

\*\* Source resource use: German patients in POET-COPD trial

Table A3: Costs per COPD exacerbation from the SHI perspective, in €2010

| <b>Hospitalization costs</b>                     | <b>Non-severe exacerbation</b> |      |           |              |              | <b>Severe exacerbation</b> |       |           |                 |               |
|--------------------------------------------------|--------------------------------|------|-----------|--------------|--------------|----------------------------|-------|-----------|-----------------|---------------|
| <b>per exacerbation</b>                          | Resource use                   |      | Unit cost | Costs        |              | Resource use               |       | Unit cost | Costs           |               |
|                                                  | mean                           | SE   |           | mean         | SE           | mean                       | SE    |           | mean            | SE            |
| ICU days                                         | na                             | na   | na        | na           | na           | 0.53                       | 0.27  | 321.02    | 170.14          | 86.68         |
| Non-ICU days                                     | na                             | na   | na        | na           | na           | 10.26                      | 1.05  | 268.74    | 2,758.35        | 282.63        |
| Ambulance rides                                  | na                             | na   | na        | na           | na           | 0.43                       | 0.03  | 397.36    | 169.24          | 10.29         |
| <b>Total costs</b>                               |                                |      |           |              |              |                            |       |           | <b>3,097.73</b> | <b>295.80</b> |
| <b>Non-hospital costs</b>                        | <b>Non-severe exacerbation</b> |      |           |              |              | <b>Severe exacerbation</b> |       |           |                 |               |
| <b>per exacerbation</b>                          | Resource use                   |      | Unit cost | Costs        |              | Resource use               |       | Unit cost | Costs           |               |
|                                                  | mean                           | SE   |           | mean         | SE           | mean                       | SE    |           | mean            | SE            |
| Outpatient visits to general practitioners       | 0.55                           | 0.04 | 19.54     | 10.65        | 0.82         | 0.40                       | 0.09  | 19.54     | 7.74            | 1.85          |
| Outpatient visits to respiratory specialists     | 0.63                           | 0.04 | 21.16     | 13.33        | 0.92         | 0.64                       | 0.16  | 21.16     | 13.58           | 3.42          |
| Outpatient visits to non-respiratory specialists | 0.07                           | 0.02 | 21.52     | 1.45         | 0.38         | 0.00                       | 0.00  | 21.52     | 0.00            | 0.00          |
| Outpatient visits to other health care providers | 0.01                           | 0.00 | 10.40     | 0.10         | 0.03         | 0.08                       | 0.04  | 10.40     | 0.83            | 0.38          |
| ER visits not followed by hospital admission     | 0.02                           | 0.01 | 15.58     | 0.31         | 0.09         | 0.34                       | 0.08  | 15.58     | 5.30            | 1.26          |
| Ambulance rides to emergency room                | 0.02                           | 0.06 | 397.36    | 7.95         | 23.84        | 0.23                       | 0.06  | 397.36    | 91.39           | 25.43         |
| Days antibiotics                                 | 7.59                           | 1.05 | 1.63      | 12.37        | 1.71         | 6.91                       | 1.24  | 1.63      | 11.27           | 2.02          |
| Days systemic steroids                           | 10.23                          | 1.13 | 0.30      | 3.07         | 0.34         | 29.46                      | 10.93 | 0.30      | 8.84            | 3.28          |
| Days short-acting beta-agonists                  | 0.49                           | 0.32 | 0.43      | 0.21         | 0.14         | 8.61                       | 7.47  | 0.43      | 3.70            | 3.21          |
| Days short-acting anticholinergics               | 0.01                           | 0.01 | 1.07      | 0.01         | 0.01         | 3.07                       | 1.18  | 1.07      | 3.29            | 1.26          |
| Days inhaled corticosteroids                     | 3.16                           | 1.22 | 0.59      | 1.86         | 0.72         | 1.61                       | 1.08  | 0.59      | 0.95            | 0.64          |
| Days theophylline                                | 2.48                           | 0.74 | 0.23      | 0.57         | 0.17         | 10.44                      | 5.36  | 0.23      | 2.40            | 1.23          |
| Days mucolytics                                  | 2.61                           | 1.17 | 0.40      | 1.04         | 0.47         | 9.20                       | 5.68  | 0.40      | 3.68            | 2.27          |
| Travel (km)                                      | 0.00                           | 0.00 | 0.20      | 0.00         | 0.00         | 0.00                       | 0.00  | 0.20      | 0.00            | 0.00          |
| <b>Total costs</b>                               |                                |      |           | <b>52.94</b> | <b>23.96</b> |                            |       |           | <b>152.97</b>   | <b>26.41</b>  |
| <b>Total costs of exacerbation</b>               |                                |      |           | <b>52.94</b> | <b>23.96</b> |                            |       |           | <b>3250.70</b>  | <b>296.97</b> |

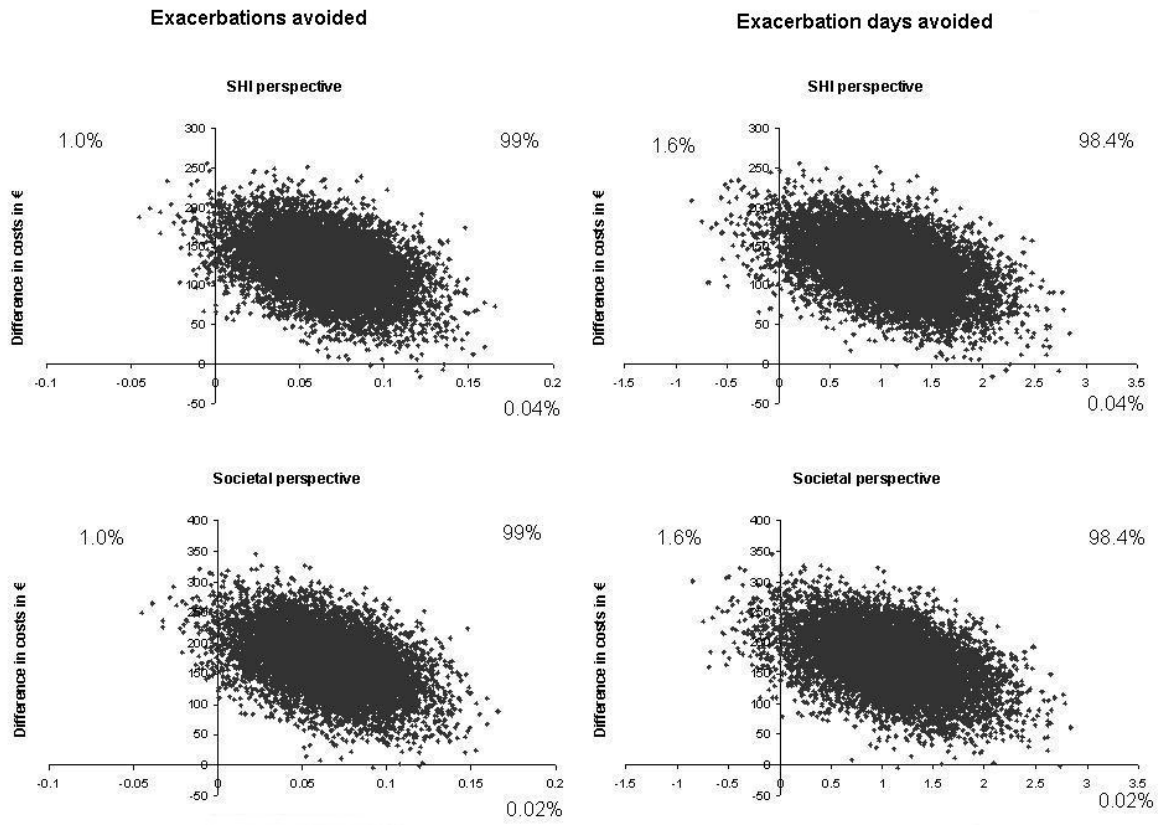

Figure A1: Cost-effectiveness planes for tiotropium versus salmeterol: exacerbations and exacerbation days avoided, SHI and societal perspective
